# Supplementary material for: Rice CONSTITUTIVE TRIPLE-RESPONSE2 is involved in the ethylene-receptor signalling and regulation of various aspects of rice growth and development
Source: PubMed Central journal article supplement (PMC3830475; doi:10.1093/jxb/ert272), 2013-09-04
Supplement: supp_ert272_jexbot099457_file001.pdf [file supp_ert272_jexbot099457_file001.pdf]

**Supplemental data S1. Primer sets for cloning and qRT-PCR.**

| <b>Primers</b> | <b>sequences</b>                  |
|----------------|-----------------------------------|
| AtCTR1OF       | 5'-atgtcgacGTTCTCGGCATGAATCAT-3'  |
| AtCTR1PR       | 5'-atgaattcGGAAAAGAGAGTTATCGCG-3' |
| OsCTR2-F       | 5'- ATAGATCTATGAAGGCCGACGCCAAG-3' |
| OsCTR2-R       | 5'-ATAGATCTTCAAGGGCTCGTATCTTC-3'  |
| OsCTR2-N-F     | 5'-ATGAAGGCCGACGCCAAG-3'          |
| OsCTR2-NR      | 5'-CAGGATTACAAACCTGTC-3'          |
| OsCTR2-F       | 5'-GAAGATTAGTTCAGGTTCTG-3'        |
| OsCTR2-R       | 5'-CAATCAGATATTCCCTGTCA-3'        |
| OsCTR3-F       | 5'-GGTTTGTAAGGGAGTACGTCGT-3'      |
| OsCTR3-R       | 5'-CTTAGCAACTGAATACTGAGGA-3'      |
| EF4-F          | 5'-AGCTTCTCAGGGATGGCCAAT-3'       |
| EF4-R          | 5'- CGACGTTCCGGGTGAGGTTGT-3'      |
| SAP-F          | 5'- GCGGATCCGACGCGCTCA-3'         |
| SAP-R          | 5'- GCTGAGGAGGAACTTGTTC-3'        |
| Sub1C-F        | 5'- CTGCTCCGACGACCTGAT-3'         |
| Sub1C-R        | 5'- TTAGGCGAGTCGCATGTCAA-3'       |
| ADH2-F         | 5'- CCCATCCCTGGATTCAGGT-3'        |
| ADH2-R         | 5'- CACGAGGTAGGTGCTGATTGA-3'      |
| SC129-F        | 5'- TGACGGTGTACGGTCCGAT-3'        |
| SC129-R        | 5'- TCGGCGTACTGGTCACAGAT-3'       |
| OsAct-F        | 5'-GAAGATCACTGCCTTGCTCC-3'        |
| OsAct-R        | 5'- CGATAACAGCTCCTCTTGGC-3'       |
| UBI-F          | 5'-ATGGAAAATCCCACCTACTAAATT-3'    |
| UBI-R          | 5'-TTG AACAACTCGTAGCAACTCATC-3'   |
| CTR1-F         | 5'-CATCGTTTCTGGGTTAATGGCT-3'      |
| CTR1-R         | 5'-TCCTTGAAGGCTGGATCACTAC-3'      |

For *OsCTR2* expression measurement, the primer set was OsCTR2-F and OsCTR2-R. Expression of *OsCTR3* was measured with the primer set OsCTR3-F and OsCTR3-R. EF4-F and EF4-R were for *EF4* (Os 11g0621500) expression measurement. *SAP* (Os02g0324700) expression was measured with the primer set SAP-F and SAP-R. *Sub1C* expression was measured with the primer set Sub1C-F and Sub1C-R. The primer set ADH2-F and ADH2-R was for *ADH2* expression measurement. *SC129* expression was measured by SC129-F and SC129-R. The internal calibrator for rice gene expression was *OsActin* with the primer set was OsAct-F and OsAct-R. For Arabidopsis *ERF1* measurement, *Ubiquitin* was used as the internal calibrator, with

the primer set UBI-F and UBI-R. Arabidopsis CTR1 copy number was measured with the primer set CTR1-F and CTR1-R.
